# Supplementary material for: Increased sensitivity to iron deficiency in Arabidopsis thaliana overaccumulating nicotianamine
Source: PubMed Central journal article supplement — J Exp Bot. 2009 Feb 2;60(4):1249–59. doi: 10.1093/jxb/erp007 (PMC2657549; doi:10.1093/jxb/erp007), 2009-02-02

**Increased sensitivity to iron deficiency in *Arabidopsis thaliana* over-accumulating nicotianamine**

*Gaëlle Cassin, Stéphane Mari, Catherine Curie, Jean-François Briat, and Pierre Czernic*

**Supplementary Material**

**Supplementary Fig. 1.** Potassium content in *Arabidopsis* Col-0 wild-type plants and the K1 NA over-accumulating line. Col-0 plants (black bars) and K1 plants (white bars) were sown on half-strength MS medium and after 5 days transferred to an iron-sufficient (Fe(III)-EDTA 50  $\mu$ M) or iron depleted (no iron added) medium for 12 days. Potassium concentration was determined by atomic absorption spectrometry in roots and leaves. Error bars represent SE of 4 repetitions.

**Supplementary Fig. 2.** Zn and Mn phenotype of the NA over-accumulating line. (A) Real time RT-PCR determination of the relative transcript levels corresponding to the *AtZIP 1-4* genes. (B) Zn and (C) Mn deficiency resistance of the K1 line. Col-0 and K1 plants over-accumulating NA were sown and transferred after 5 days to a Zn- or Mn-deficient medium. Picture was taken 12 days after transfer.

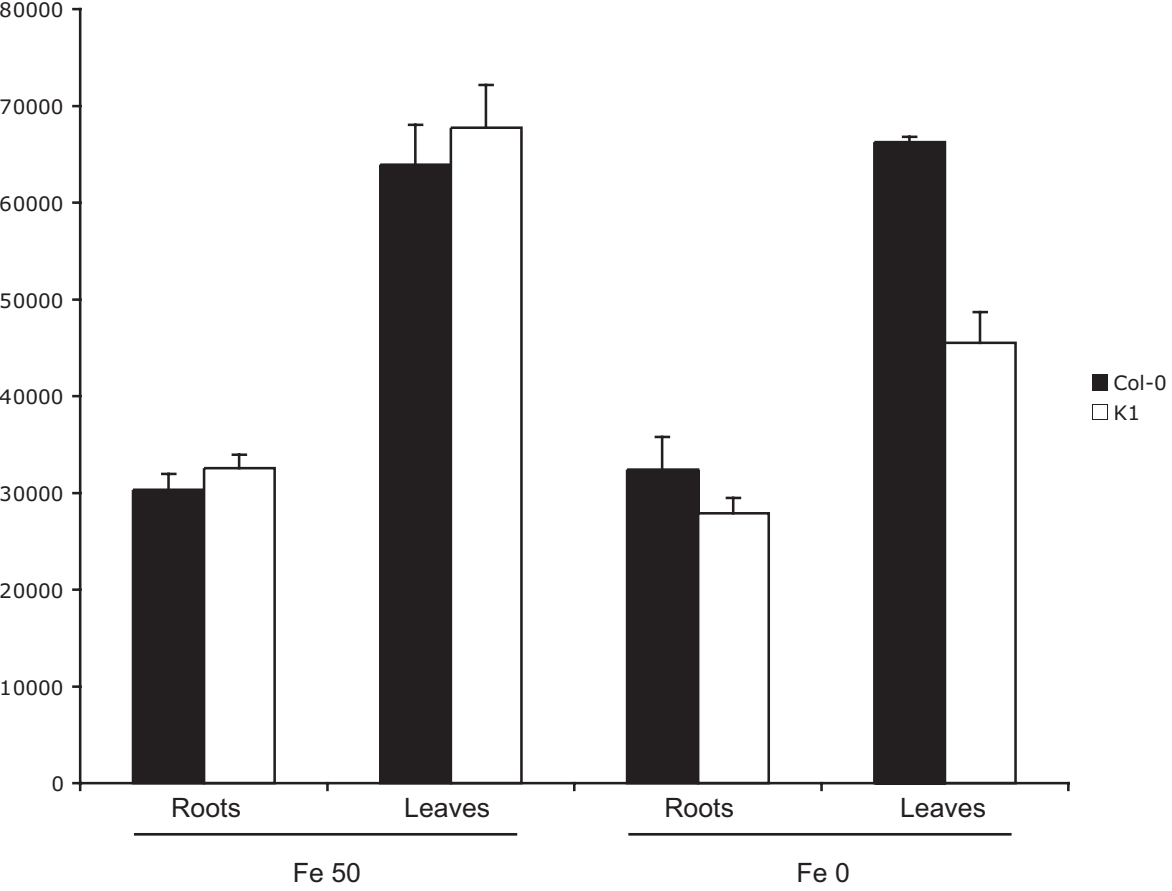

**A**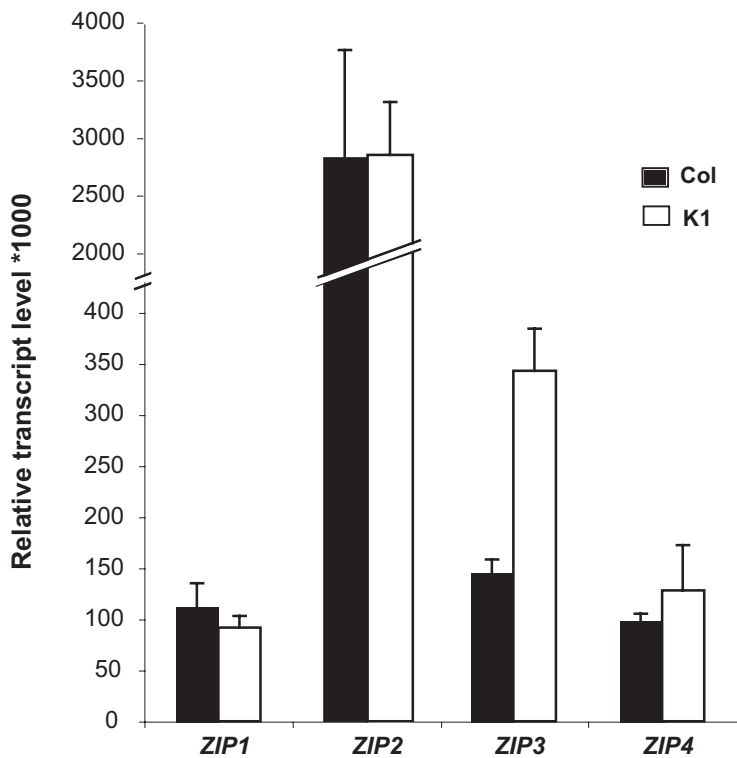**B**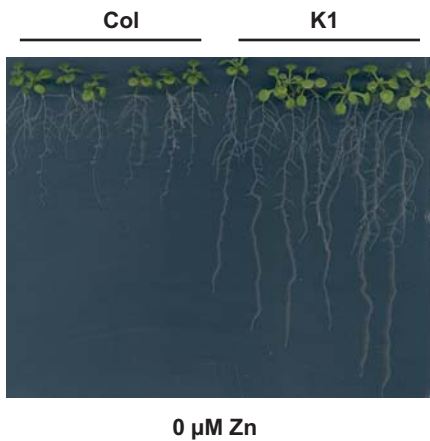**C**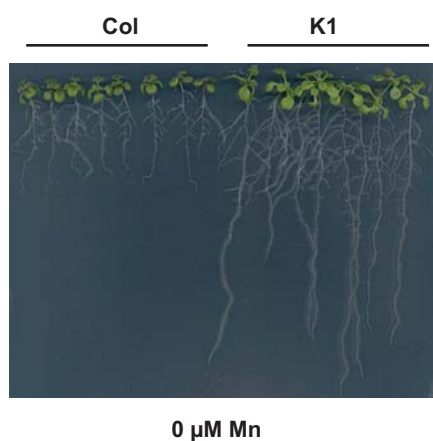

Supplement: erp007_1.pdf [file erp007_1.pdf]
